# Supplementary material for: Thermomechanical Properties of Virgin and Recycled Polypropylene—High-Density Polyethylene Blends
Source: MDPI journal article supplement (doi:10.3390/polym15214200), 2023-10-24
Supplement: s1 [file s1]

## **Supporting Information**

### **Thermomechanical Properties of Virgin and Recycled Polypropylene – High-Density Polyethylene Blends**

*Hannah Jones<sup>1</sup>, Jake McClements<sup>2</sup>, Dipa Ray<sup>1</sup>, Colin S. Hindle<sup>3</sup>, Michail Kalloudis<sup>4</sup>, and Vasileios Koutsos<sup>1,\*</sup>*

<sup>1</sup>School of Engineering, Institute for Materials and Processes, The University of Edinburgh, Sanderson Building, King's Buildings, Edinburgh EH9 3FB, United Kingdom

<sup>2</sup>School of Engineering, Newcastle University, Merz Court, Claremont Road, Newcastle Upon Tyne NE1 7RU, United Kingdom

<sup>3</sup>School of Engineering and the Built Environment, Edinburgh Napier University, Merchiston Campus, 10 Colinton Road, Edinburgh EH10 5DT, United Kingdom

<sup>4</sup>Impact Laboratories Ltd. (Impact Solutions), Impact Technology Centre, Fraser Road, Kirkton Campus, Livingston EH54 7BU, United Kingdom

\*Corresponding author, e-mail: vasileios.koutsos@ed.ac.uk, Tel +44 (0)131 650 8704

**Table S1:** Summary of the crystallinities obtained from the first and second heating ramps for vPP:vHDPE blends.

| PP wt% in<br>vPP:vHDPE blends | First Heat Crystallinity, % |      | Second Heat Crystallinity, % |      |
|-------------------------------|-----------------------------|------|------------------------------|------|
|                               | PP                          | HDPE | PP                           | HDPE |
| 0                             | 0.0                         | 56.2 | 0.0                          | 59.2 |
| 10                            | 1.8                         | 56.1 | 1.6                          | 55.2 |
| 20                            | 5.5                         | 36.9 | 5.8                          | 45.4 |
| 25                            | 6.2                         | 39.8 | 6.6                          | 42.3 |
| 40                            | 15.0                        | 27.4 | 13.3                         | 28.2 |
| 50                            | 20.1                        | 27.8 | 12.5                         | 25.0 |
| 60                            | 18.4                        | 19.2 | 20.2                         | 20.3 |
| 75                            | 24.2                        | 12.7 | 27.1                         | 10.5 |
| 80                            | 26.7                        | 8.4  | 28.8                         | 7.0  |
| 90                            | 32.3                        | 1.9  | 32.1                         | 2.6  |
| 100                           | 31.1                        | 0.0  | 42.2                         | 0.0  |

**Table S2:** Summary of the crystallinities obtained from the first and second heating ramps for rPP:rHDPE blends.

| PP wt% in<br>rPP:rHDPE blends | First Heat Crystallinity, % |      | Second Heat Crystallinity, % |      |
|-------------------------------|-----------------------------|------|------------------------------|------|
|                               | PP                          | HDPE | PP                           | HDPE |
| 0                             | 5.7                         | 40.2 | 7.3                          | 36.2 |
| 10                            | 13.2                        | 30.6 | 12.5                         | 30.8 |
| 20                            | 9.1                         | 30.3 | 14.0                         | 30.4 |
| 25                            | 13.1                        | 25.2 | 13.9                         | 23.6 |
| 40                            | 13.3                        | 27.7 | 12.0                         | 27.2 |
| 50                            | 14.7                        | 23.9 | 13.6                         | 21.9 |
| 60                            | 10.2                        | 21.1 | 15.7                         | 20.2 |
| 75                            | 18.1                        | 17.4 | 16.9                         | 16.4 |
| 80                            | 15.1                        | 18.7 | 15.6                         | 17.7 |
| 90                            | 15.8                        | 14.3 | 17.0                         | 13.9 |
| 100                           | 20.7                        | 10.8 | 19.6                         | 10.6 |

**Table S3:** Summary of  $T_{\alpha}$  and  $T_{\beta}$  taken from  $\tan\delta$  traces for virgin and recycled PP:HDPE blends.

| PP wt% in<br>PP:HDPE blends | Virgin       |             | Recycled     |             |
|-----------------------------|--------------|-------------|--------------|-------------|
|                             | $T_{\alpha}$ | $T_{\beta}$ | $T_{\alpha}$ | $T_{\beta}$ |
| 0                           | 115.9        | -           | 106.7        | 4.6         |
| 10                          | 113.8        | -           | 109.0        | 3.8         |
| 20                          | 110.6        | -           | 108.3        | 6.7         |
| 25                          | 101.1        | 12.4        | 101.7        | 8.5         |
| 40                          | 102.2        | 12.6        | 96.8         | 5.6         |
| 50                          | 98.2         | 10.2        | 105.2        | 3.6         |
| 60                          | 98.9         | 11.6        | 99.1         | 6.4         |
| 75                          | 95.8         | 15.4        | 97.1         | 4.5         |
| 80                          | 99.1         | 15.5        | 93.4         | 4.1         |
| 90                          | 95.2         | 11.2        | 90.1         | 5.2         |
| 100                         | 93.5         | 8.9         | 88.1         | 5.0         |

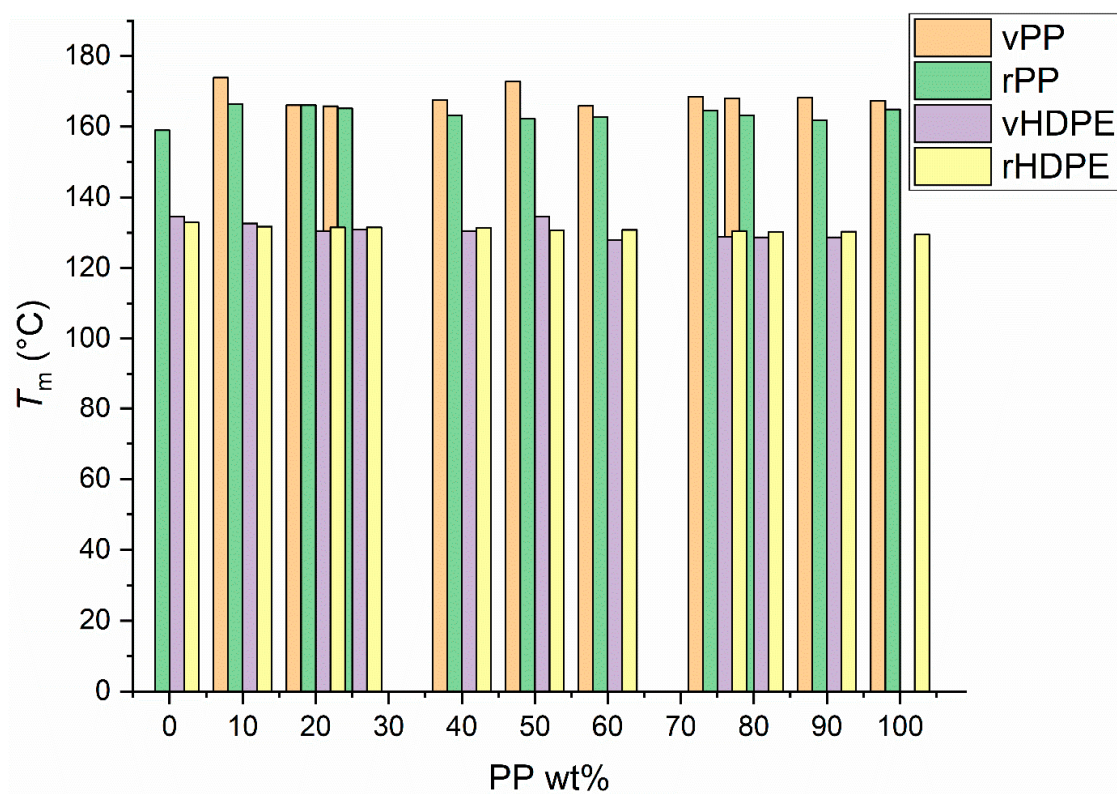

**Figure S1.** Melting temperatures of vPP, rPP, vHDPE, and rHDPE of vPP:vHDPE and rPP:rHDPE blends obtained from DSC.

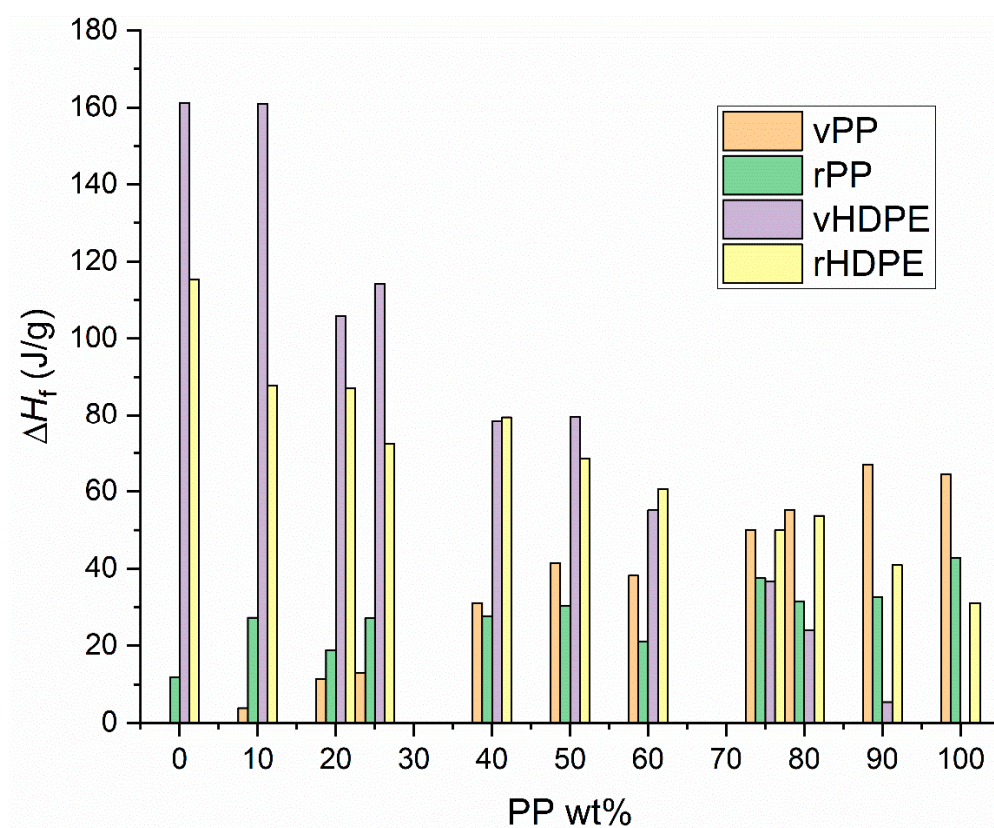

**Figure S2.** Enthalpy of fusion of vPP, rPP, vHDPE, and rHDPE of vPP:vHDPE and rPP:rHDPE blends obtained from DSC.

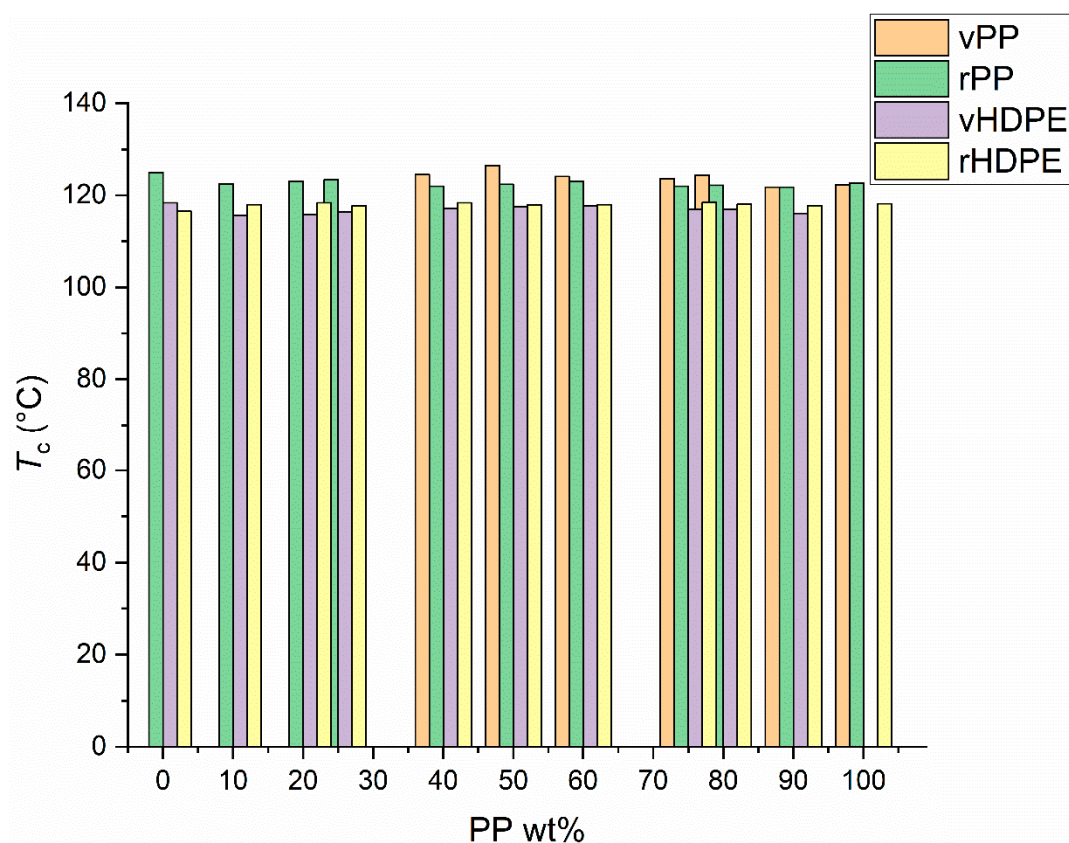

**Figure S3.** Crystallisation temperatures of vPP, rPP, vHDPE, and rHDPE of vPP:vHDPE and rPP:rHDPE blends obtained from DSC.

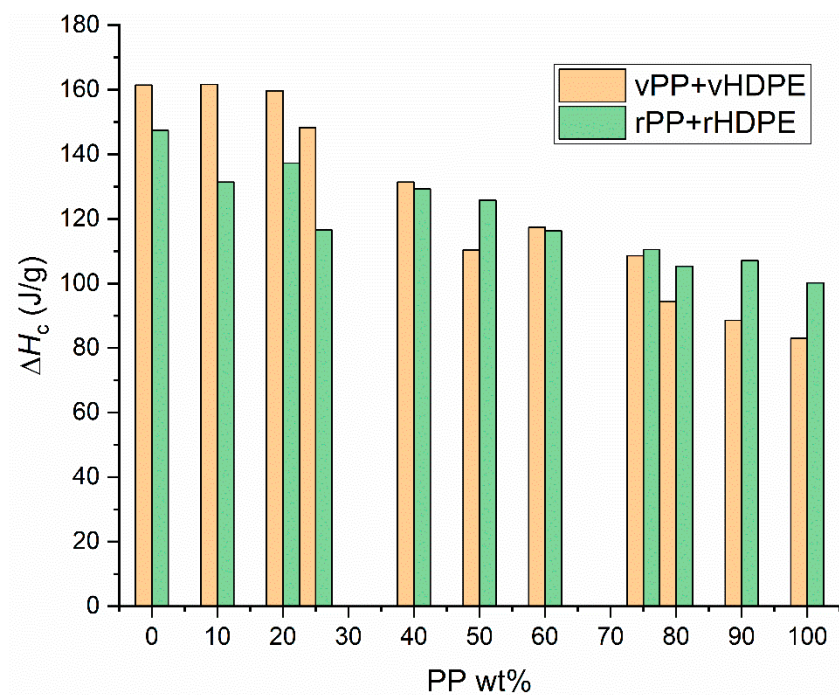

**Figure S4.** Enthalpy of crystallisation of vPP:vHDPE and rPP:rHDPE blends obtained from DSC.

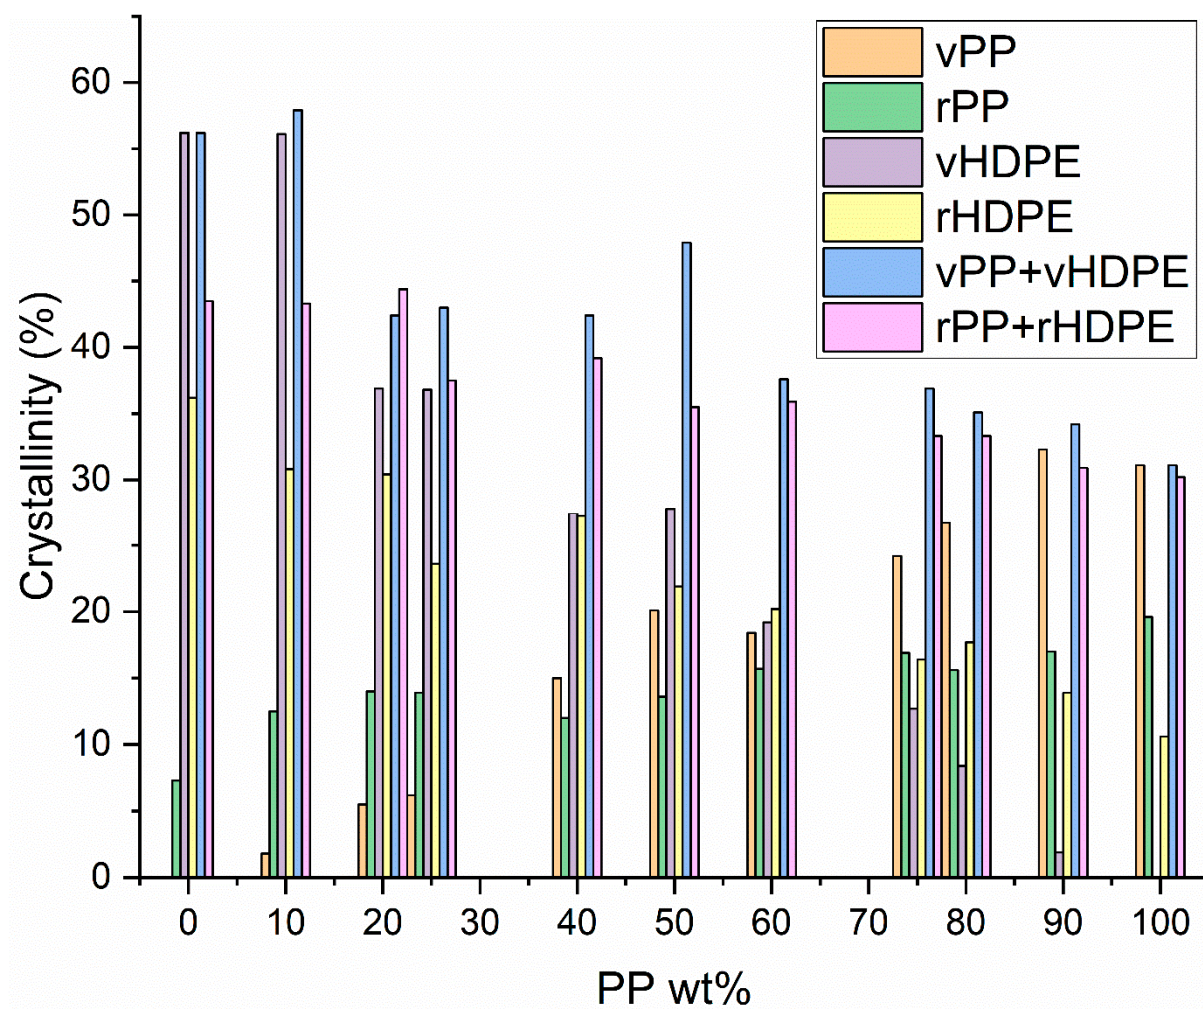

**Figure S5.** Percentage crystallinity of vPP, rPP, vHDPE, rHDPE, and total crystallinity of vPP:vHDPE and rPP:rHDPE blends obtained from DSC.
